# Supplementary material for: Evolution of Tick Vaccinology Highlights Changes in Paradigms in This Research Area
Source: MDPI journal article supplement (doi:10.3390/vaccines11020253), 2023-01-24

Most Relevant Sources

Sources

- VACCINE
- VETERINARY PARASITOLOGY
- EXPERIMENTAL AND APPLIED ACAROLOGY
- TICKS AND TICK-BORNE DISEASES
- PARASITES & VECTORS
- PARASITE IMMUNOLOGY
- PARASITOLOGY RESEARCH
- VACCINES
- VETERINARY IMMUNOLOGY AND IMMUNOPATHOLOGY
- REVISTA BRASILEIRA DE PARASITOLOGIA VETERINARIA
- PLOS ONE
- EXPERIMENTAL PARASITOLOGY
- FRONTIERS IN CELLULAR AND INFECTION MICROBIOLOGY
- INTERNATIONAL JOURNAL FOR PARASITOLOGY
- PATHOGENS
- ANIMAL BIODIVERSITY AND EMERGING DISEASES: PREDICT
- BIOTECHNOLOGY TECHNIQUES
- BMC BIOTECHNOLOGY
- DEVELOPMENTAL AND COMPARATIVE IMMUNOLOGY
- FRONTIERS IN PHYSIOLOGY
- JOURNAL OF BIOTECHNOLOGY
- PARASITOLOGY
- BMC GENOMICS
- DEUTSCHE TIERARZTLICHE WOCHENSCHRIFT
- EXPERT REVIEW OF VACCINES
- FISH & SHELLFISH IMMUNOLOGY
- GENETIC ANALYSIS-BIOMOLECULAR ENGINEERING
- INDIAN JOURNAL OF ANIMAL SCIENCES
- INFECTION AND IMMUNITY
- KAFKAS UNIVERSITESI VETERINER FAKULTESI DERGISI
- PESTS AND VECTOR-BORNE DISEASES IN THE LIVESTOCK I
- PROTEIN EXPRESSION AND PURIFICATION
- TRANSBOUNDARY AND EMERGING DISEASES
- TROPICAL ANIMAL HEALTH AND PRODUCTION
- TROPICAL BIOMEDICINE
- VETERINARY RESEARCH COMMUNICATIONS

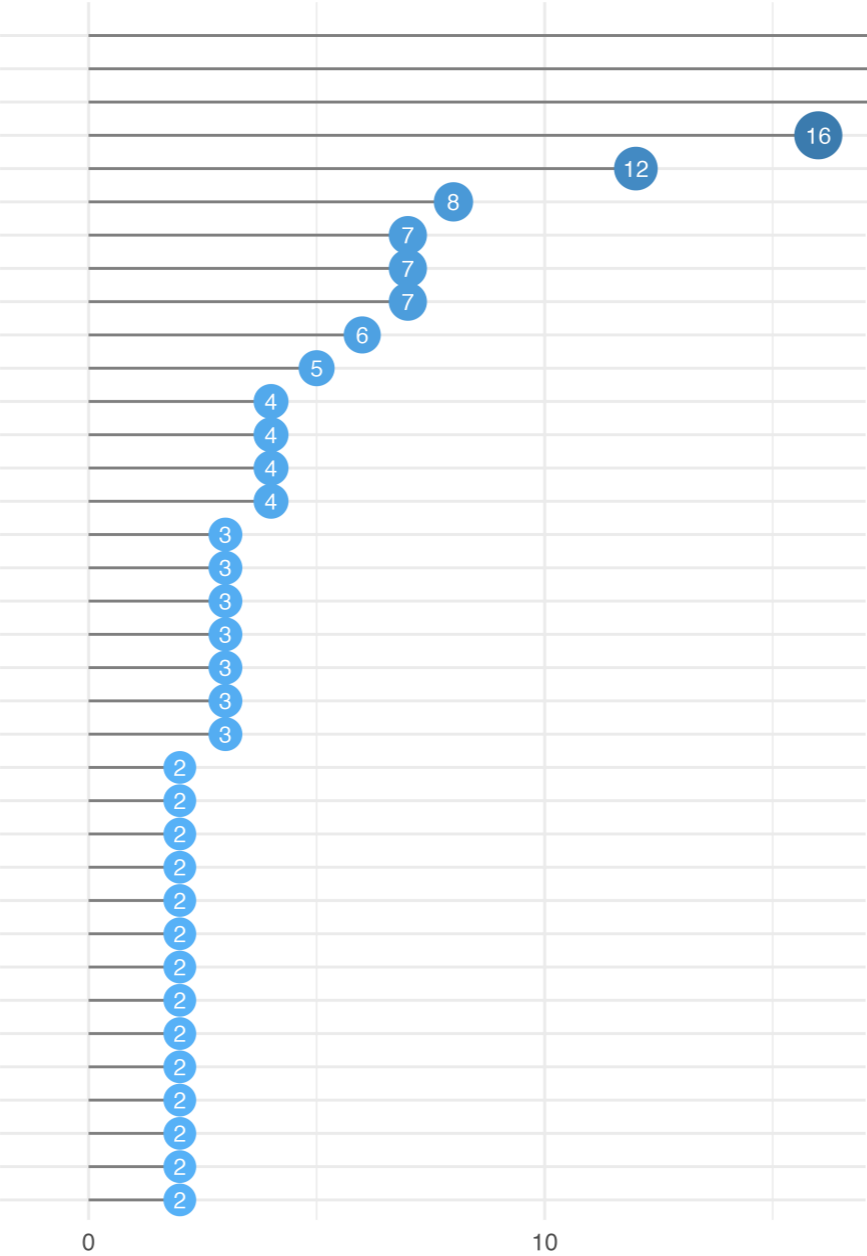

Bradford's Law

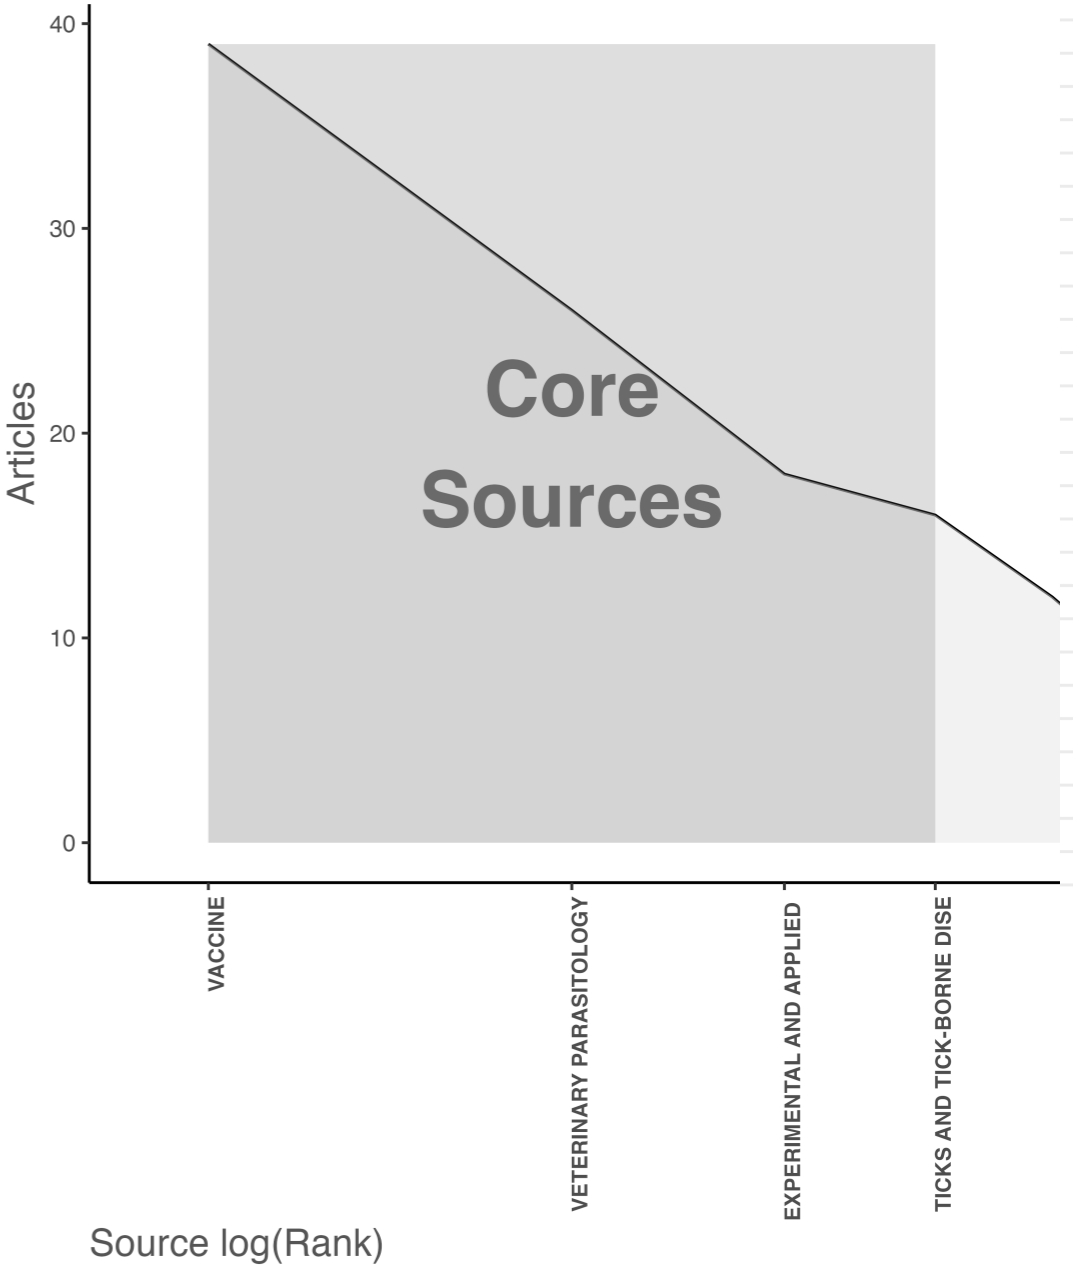

Supplement: s1 [file s1]
