# Supplementary material for: Evolution of Tick Vaccinology Highlights Changes in Paradigms in This Research Area
Source: MDPI journal article supplement (doi:10.3390/vaccines11020253), 2023-01-24
Supplement: s1 [file s1]

# Corresponding Author's Country

Countries

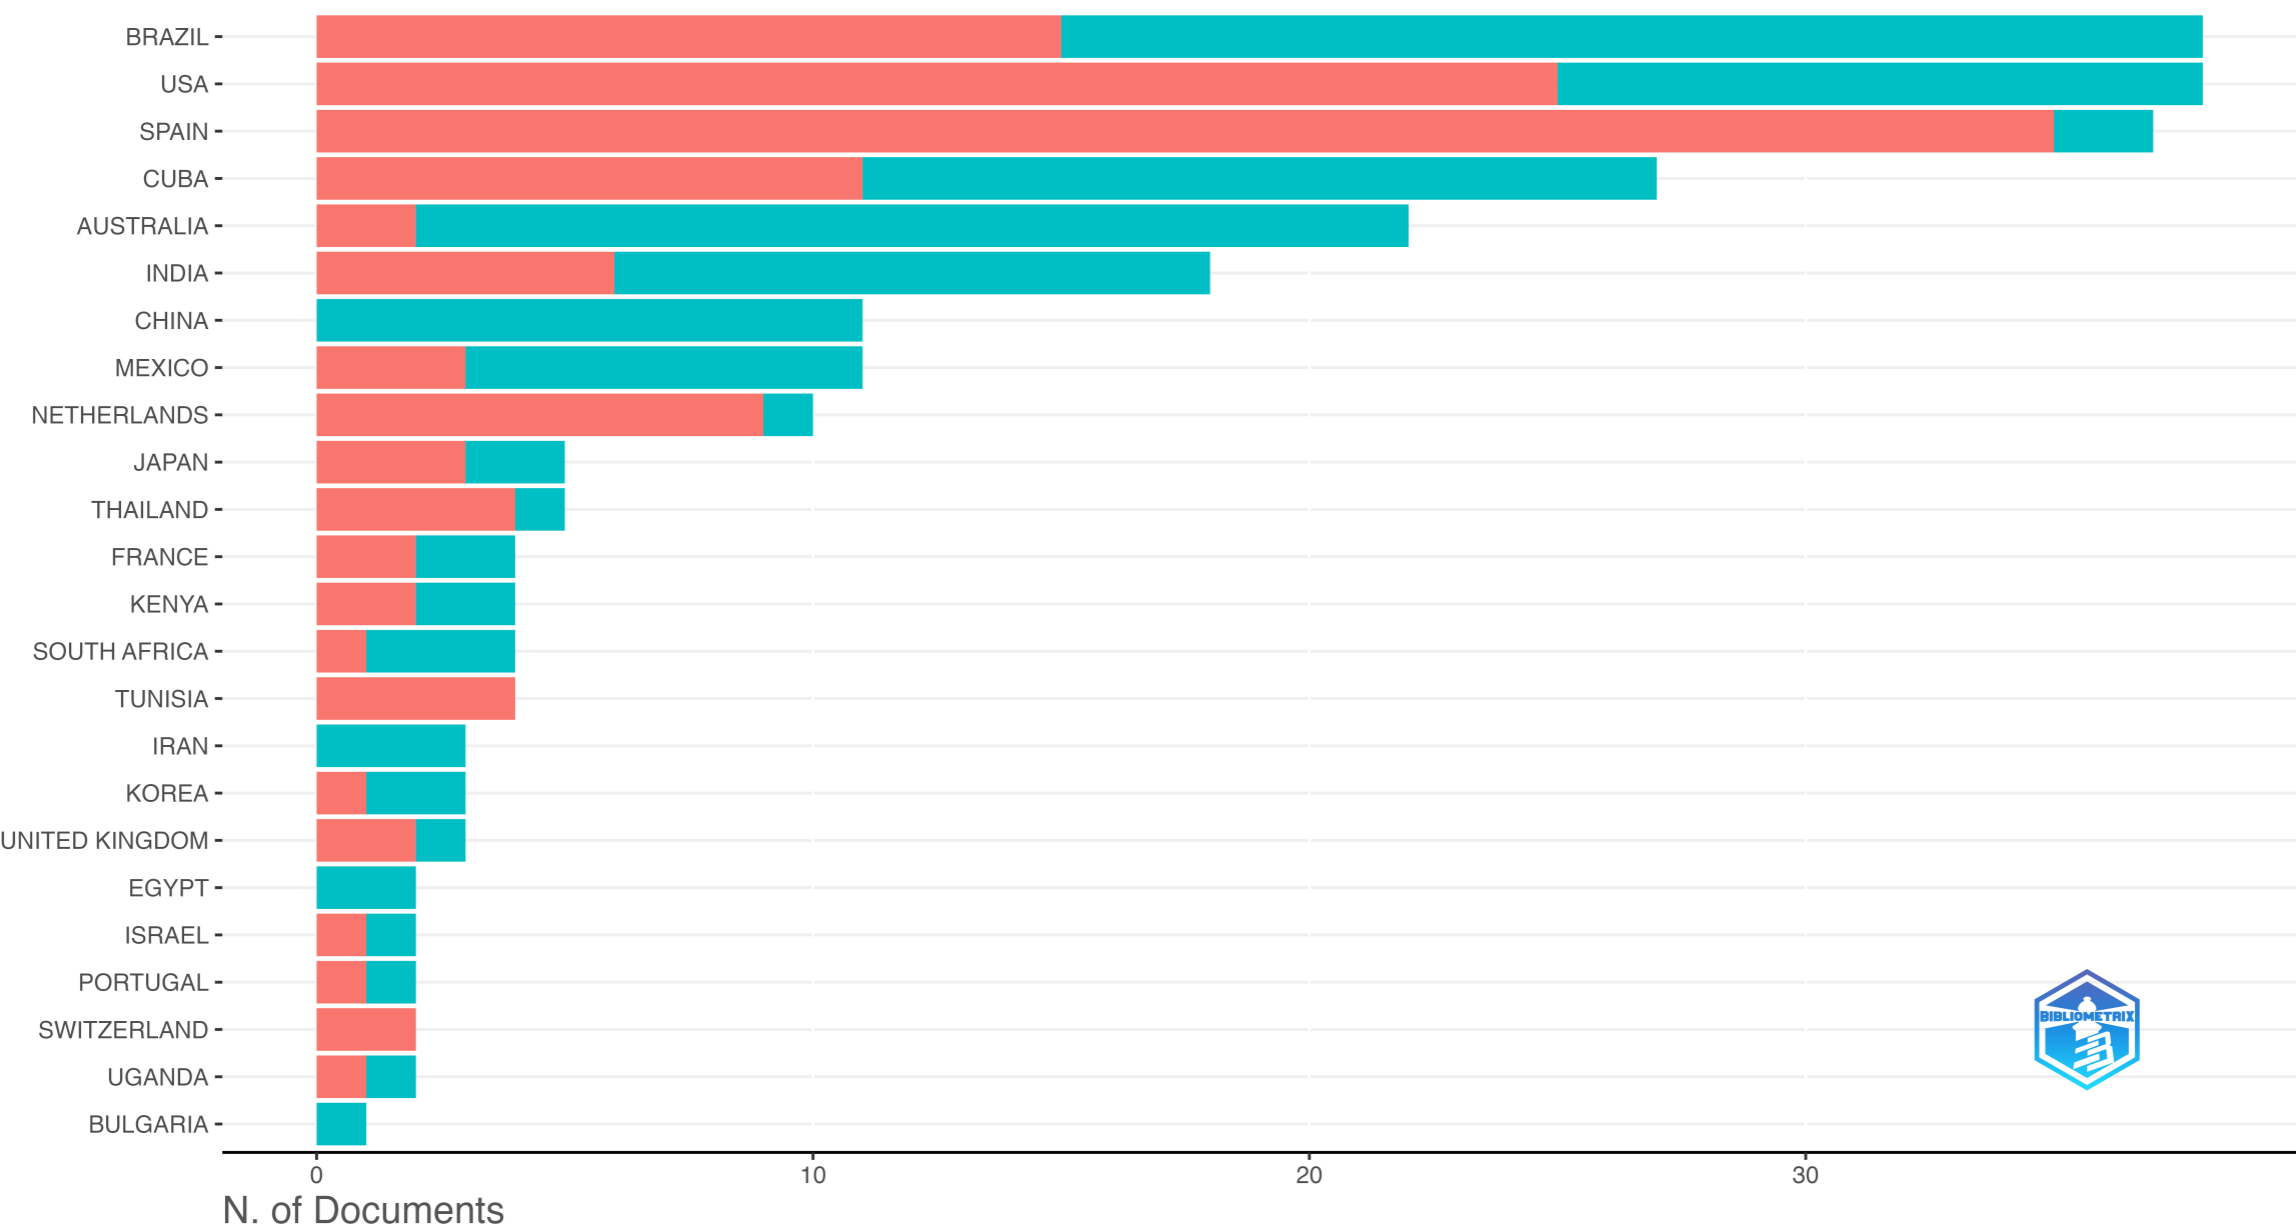

Collaboration

- SCP
- MCP

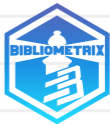

SCP: Single Country Publications, MCP: Multiple Country Publications
