# Supplementary figures and images for: Evolution of Tick Vaccinology Highlights Changes in Paradigms in This Research Area
Source: MDPI journal article supplement (doi:10.3390/vaccines11020253), 2023-01-24

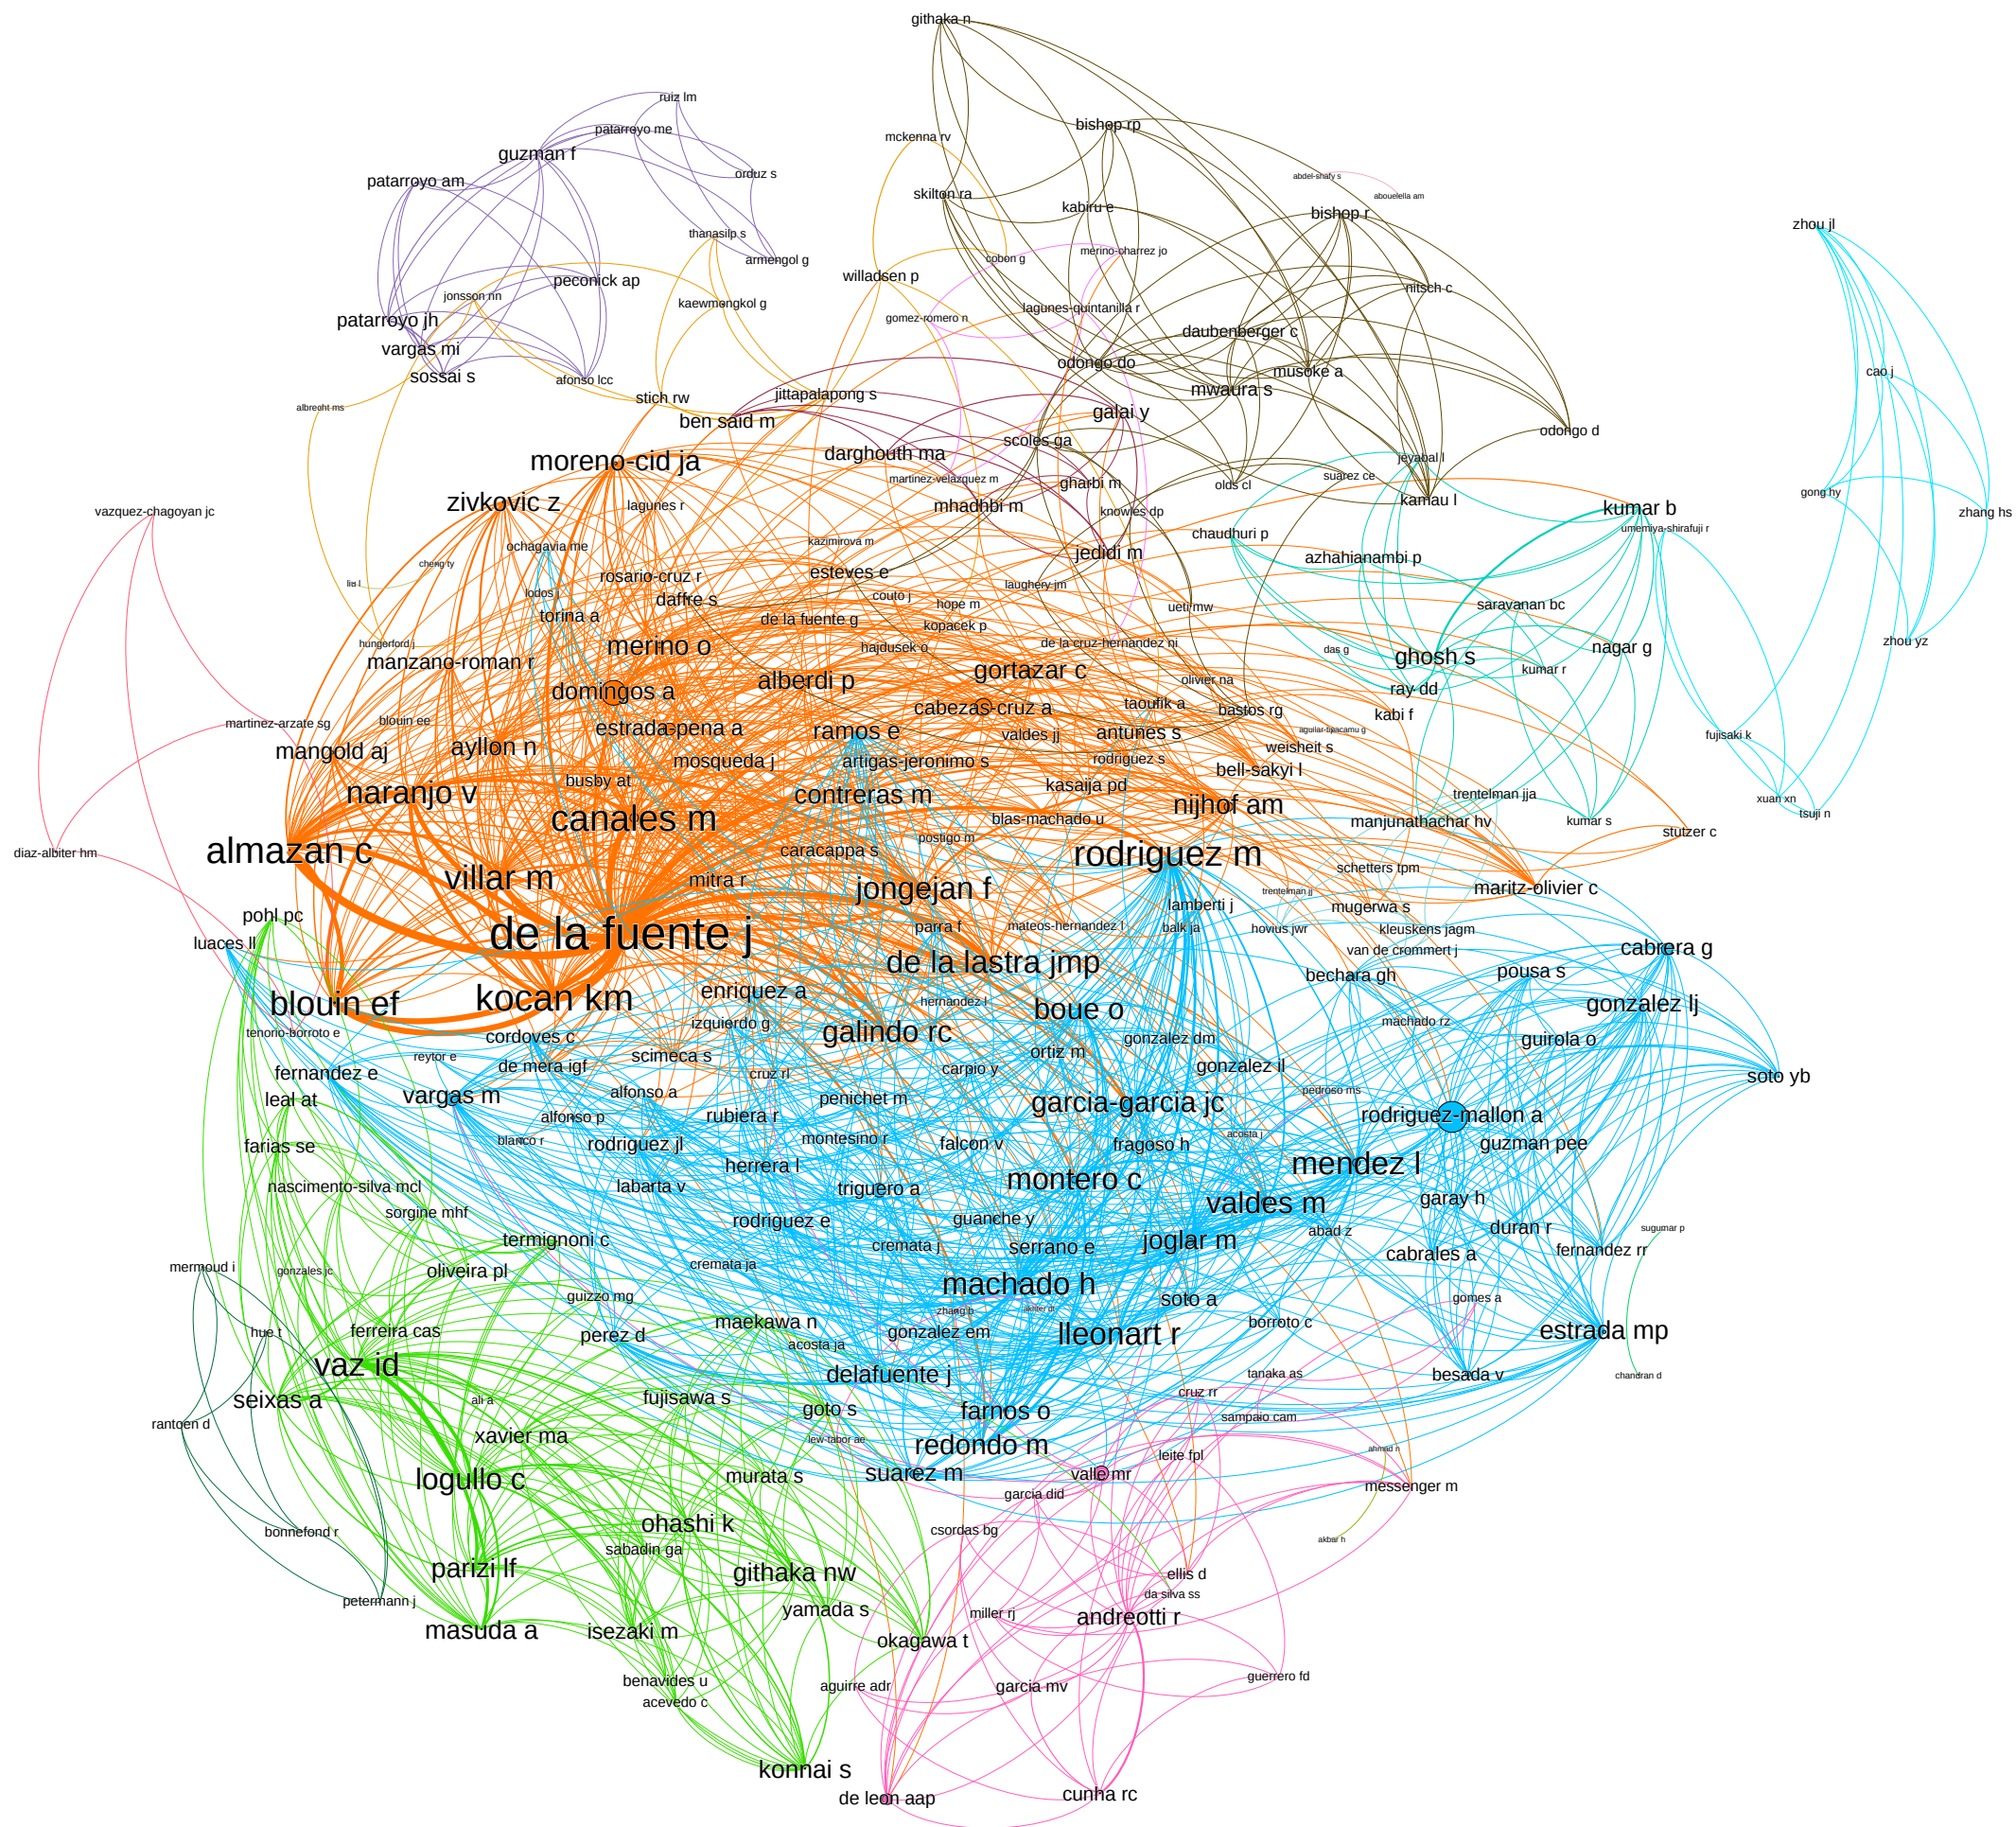

Supplement: s1 [file s1]

Most Global Cited Documents

Documents

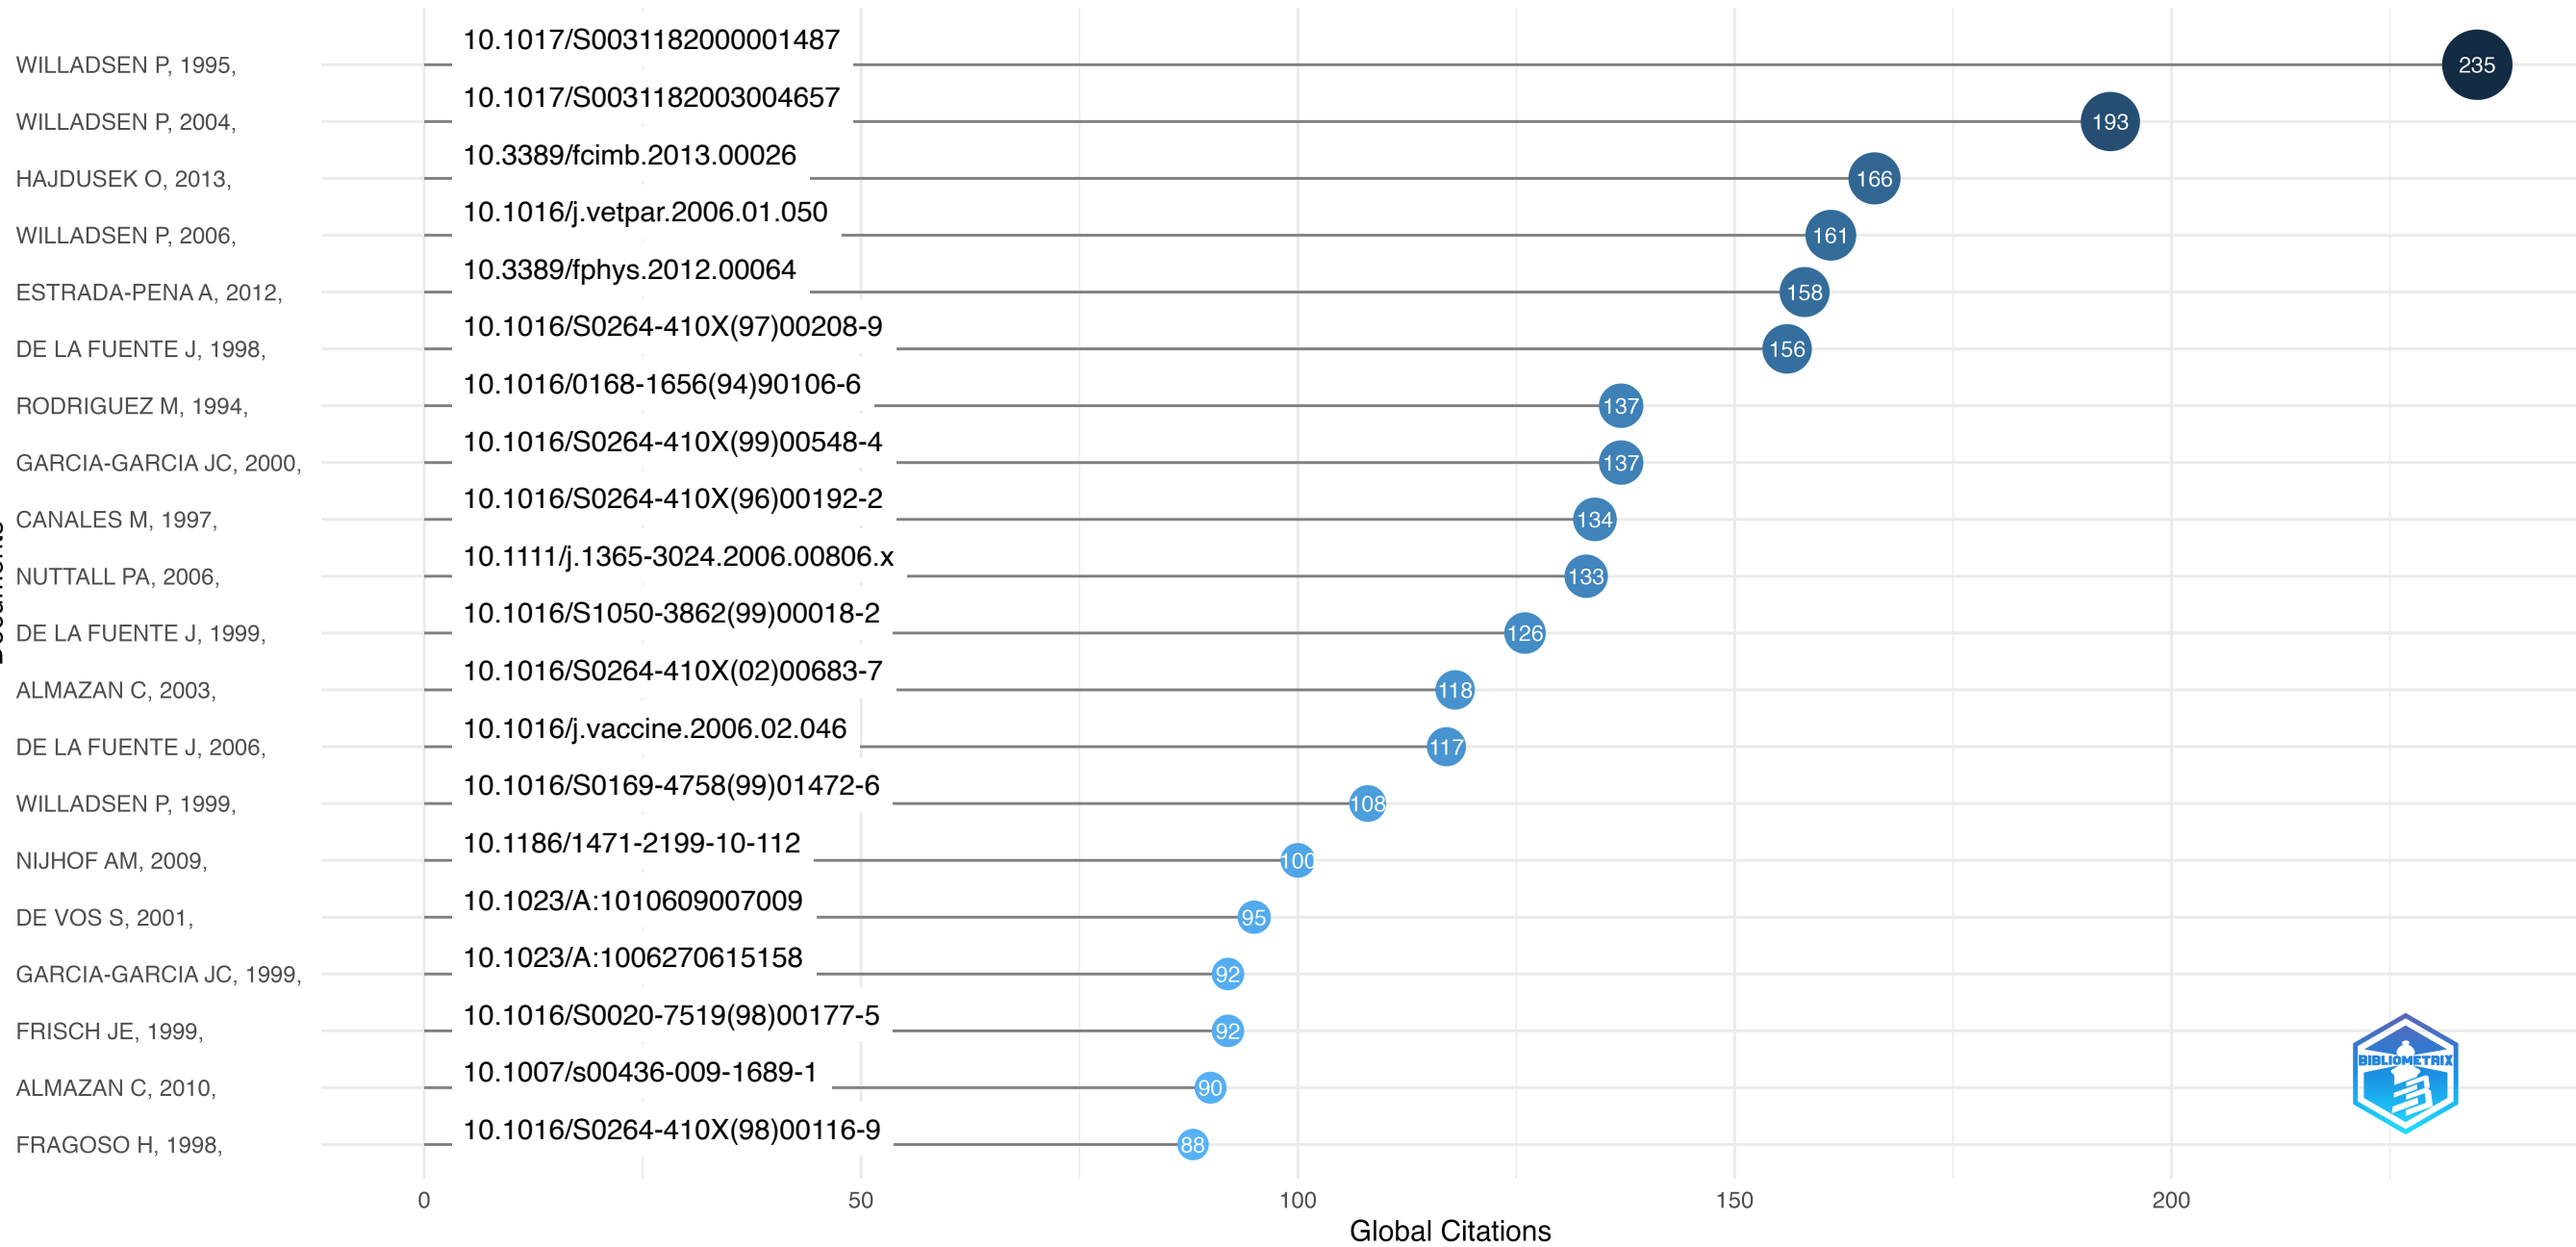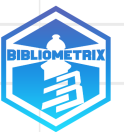

Supplement: s1 [file s1]

Most Relevant Authors

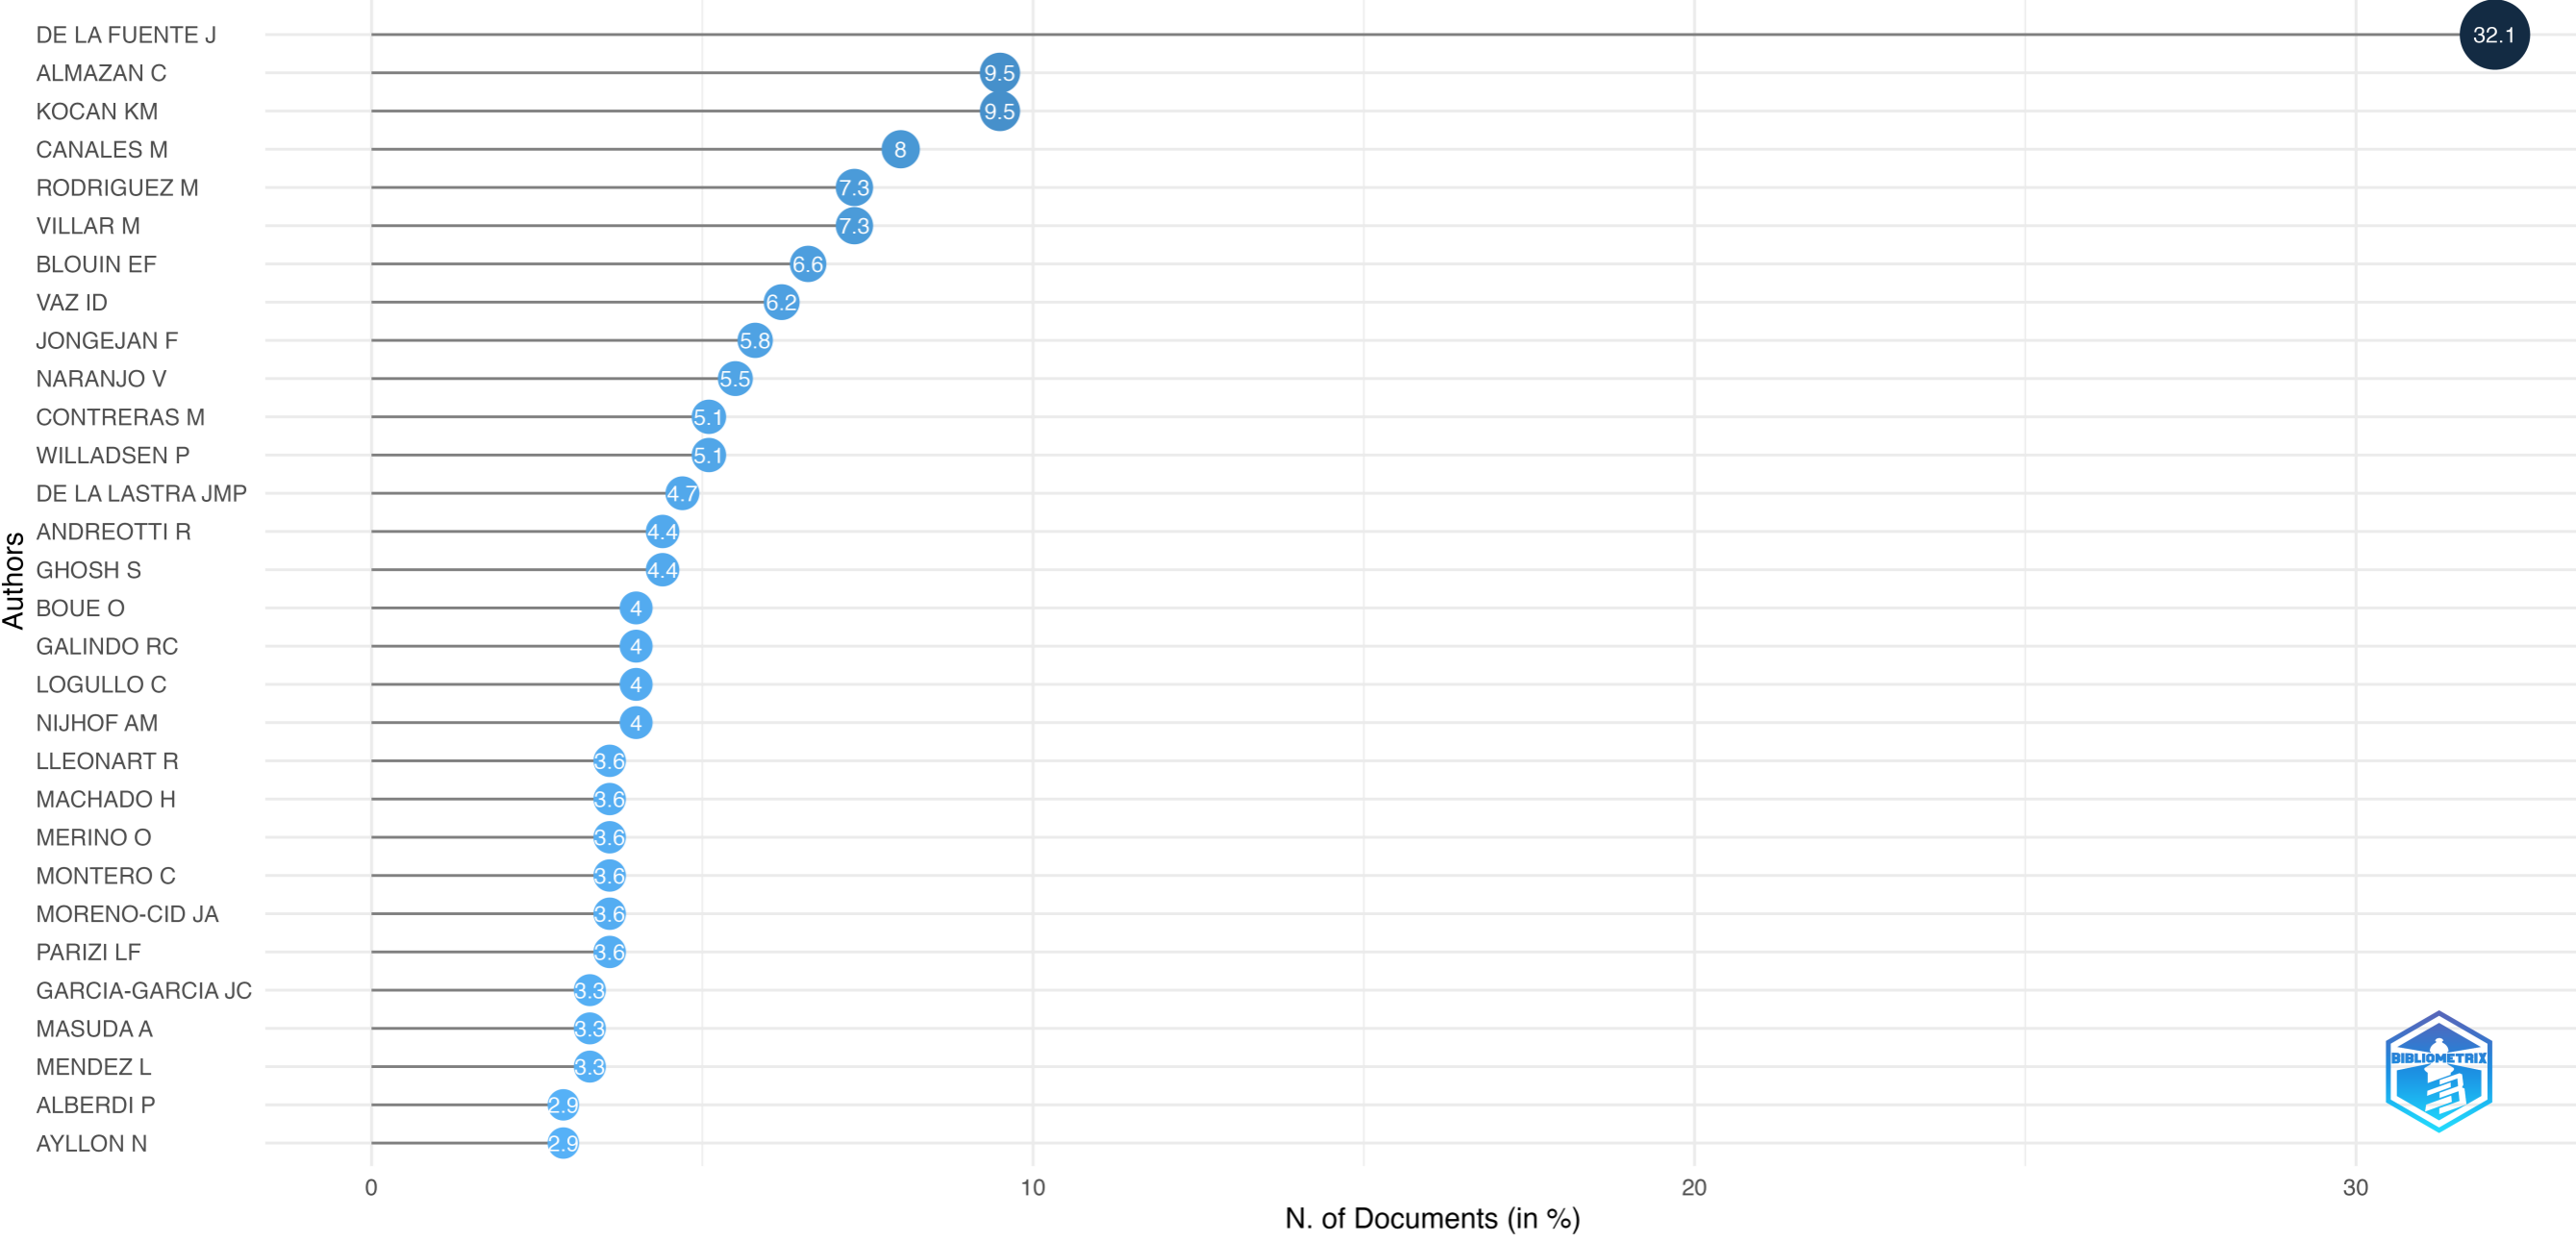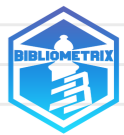

Supplement: s1 [file s1]

# Country Collaboration Map

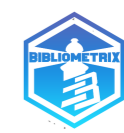

Supplement: s1 [file s1]

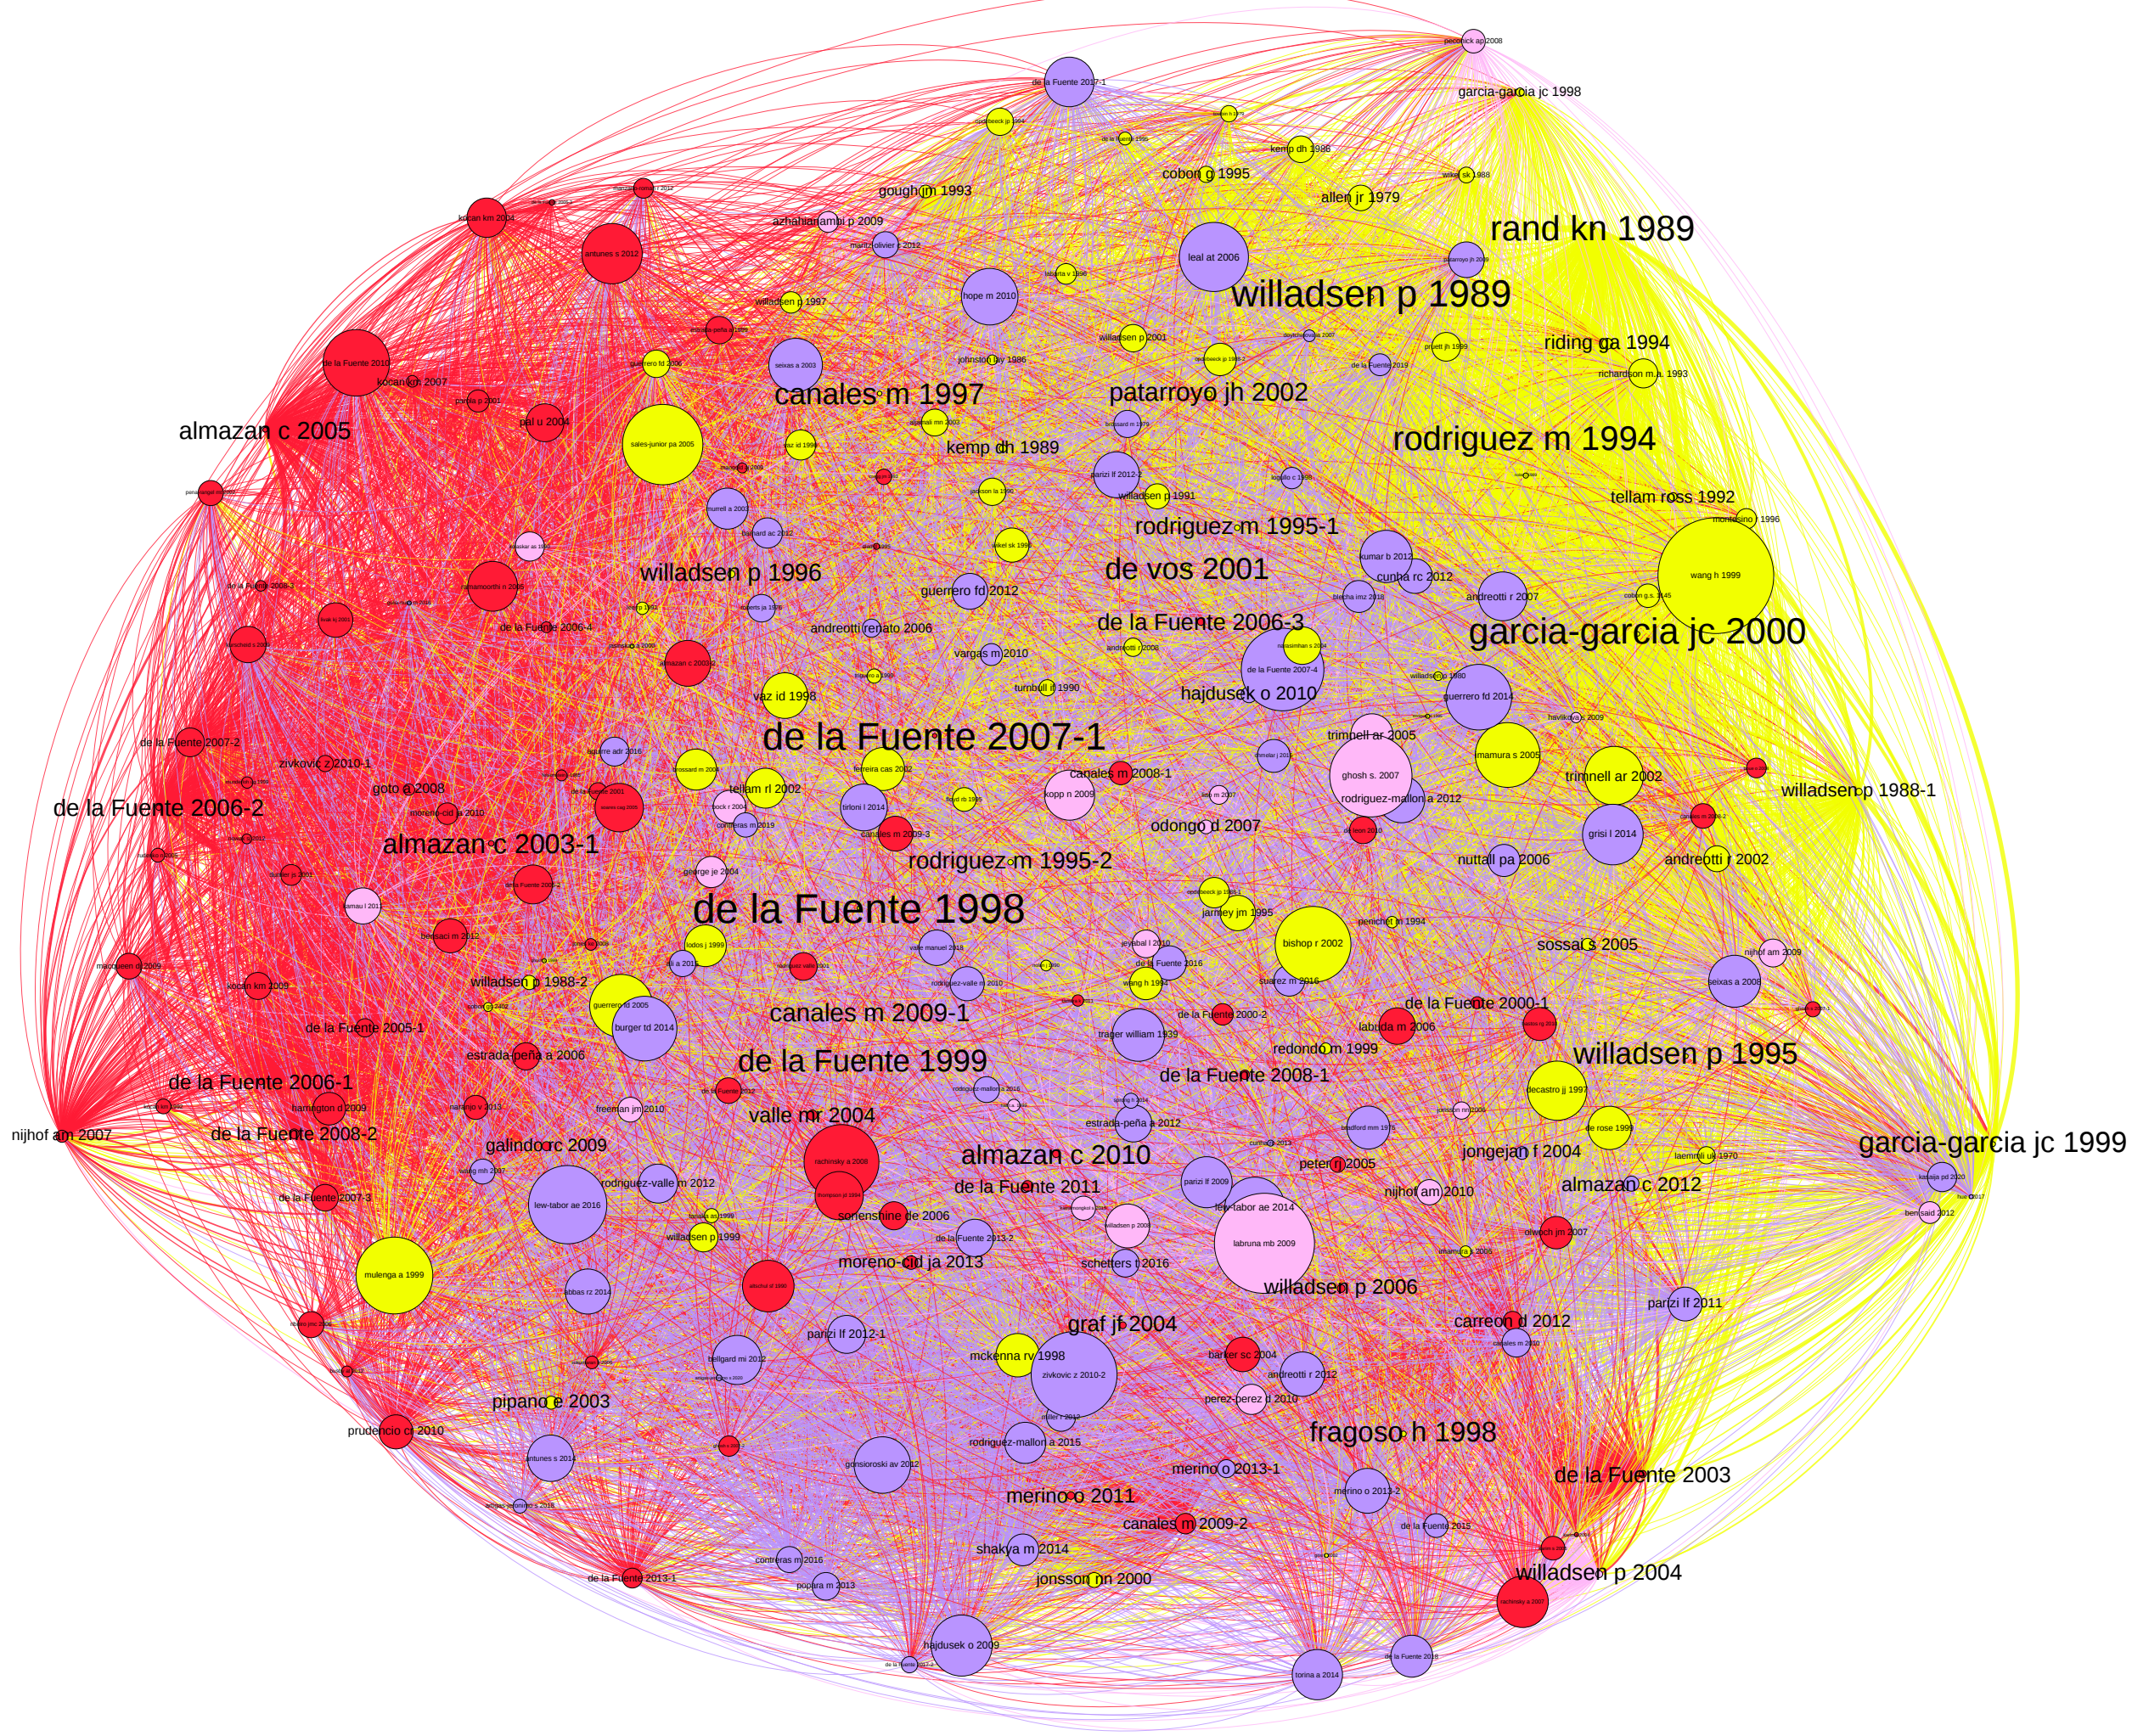

Supplement: s1 [file s1]

# Top-Authors' Production over Time

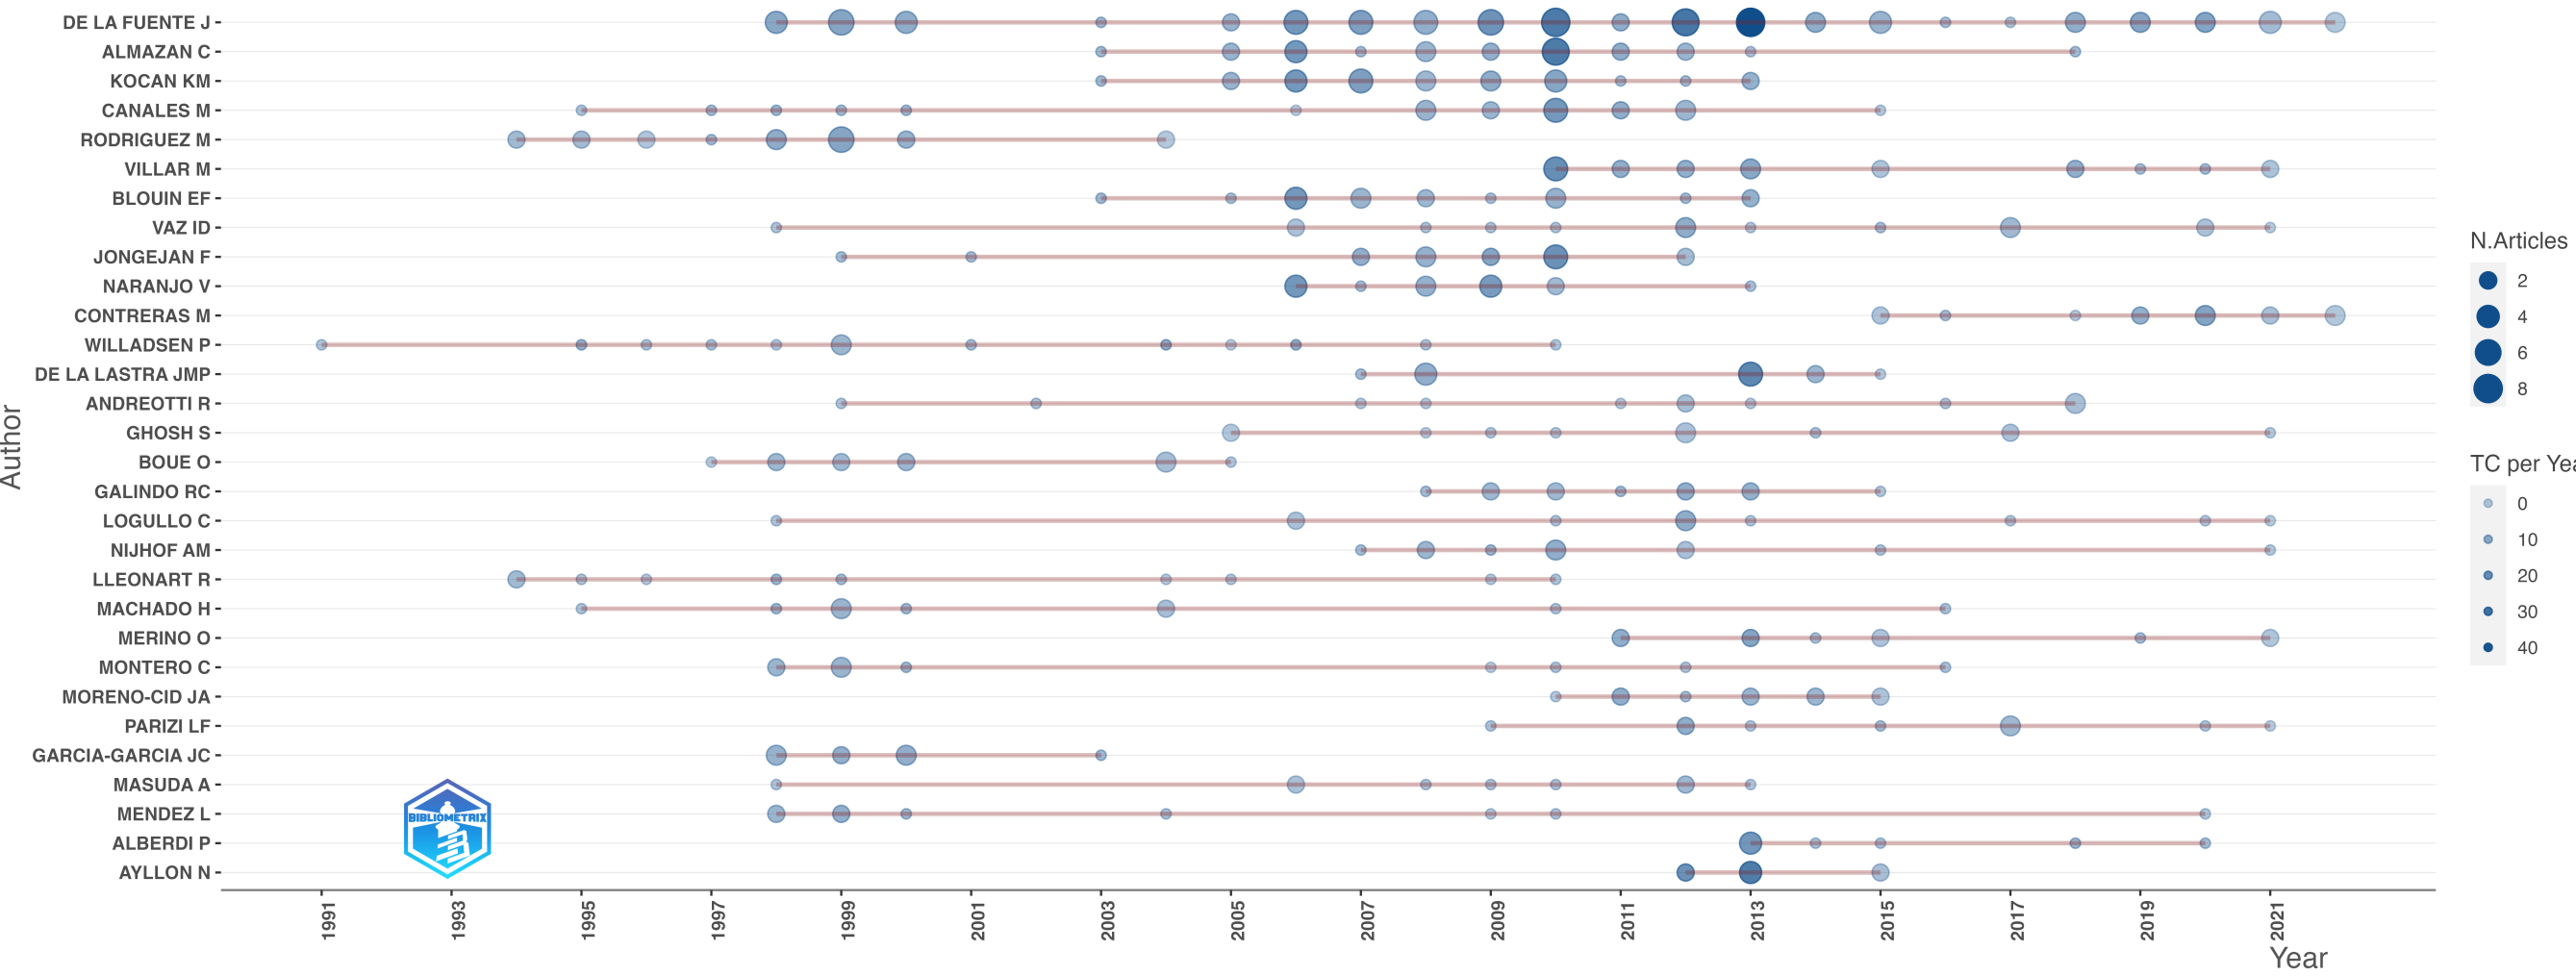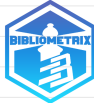

Supplement: s1 [file s1]
